# Supplementary material for: Host-Induced Gene Silencing of Rice Blast Fungus Magnaporthe oryzae Pathogenicity Genes Mediated by the Brome Mosaic Virus
Source: PubMed Central journal article supplement (PMC5664091; doi:10.3390/genes8100241), 2017-09-26
Supplement: genes-08-00241-s001.pdf [file genes-08-00241-s001.pdf]

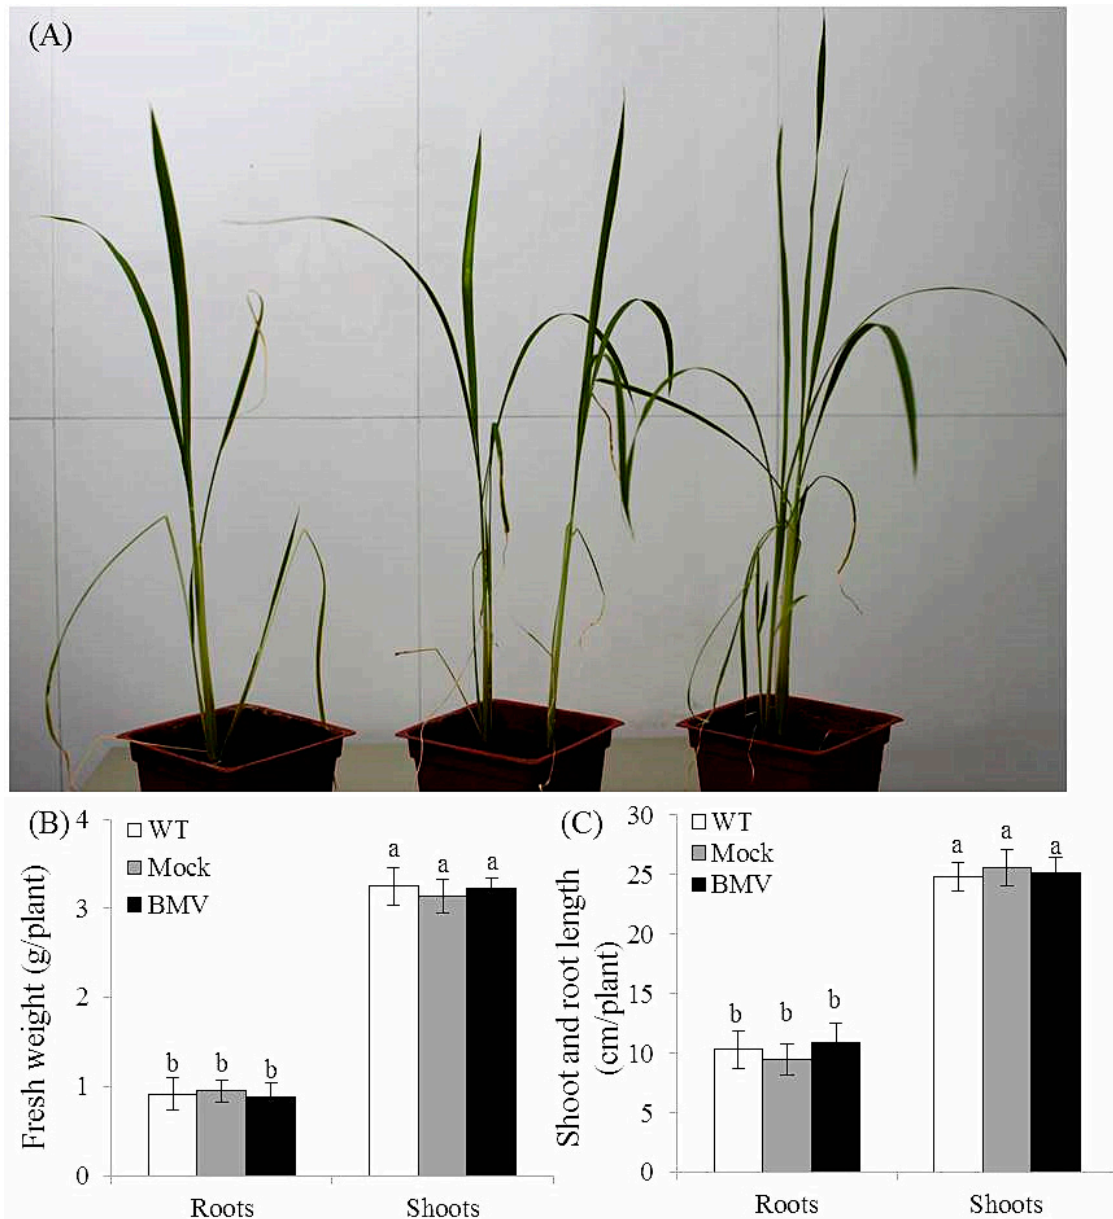

**Figure S1.** Effects of BMV infection on the growth of rice CO-39 plants. 2-week-old rice CO-39 plants were inoculated with BMV vector without inserting gene fragments for 15 d. Growth phenotypes of WT, Mock and BMV (without inserting) plants were monitored (A). In addition, fresh weight (B) and length (C) of shoots and roots from these plants was examined. Each experiment was performed with three biological repeats. Values represented mean  $\pm$  SD in at least three independent sample collections ( $n = 10$ ). Different letter indicated a significant difference at  $p < 0.05$ .

**Table S1.** Primers used in this study.

| <b>Gene</b>                      | <b>Usage</b>   | <b>Sequence (5'-3')</b>                                        |
|----------------------------------|----------------|----------------------------------------------------------------|
| <i>OsPDS(s)</i>                  | Gene silencing | CCATGGTGCCAGATATTTTGCAGGACAAC<br>CCTAGGTCCAGCAATCACGACCTGTAATG |
| <i>OsPDS(as)</i>                 | Gene silencing | CCATGGTCCAGCAATCACGACCTGTAATG<br>CCTAGGTGCCAGATATTTTGCAGGACAAC |
| <i>MoABC1(s)</i>                 | Gene silencing | CCATGGGGTTTCAATGGCGTGGTA<br>CCTAGGTTTCGCAGCAAAGGTAAGG          |
| <i>MoABC1(as)</i>                | Gene silencing | CCATGGTTTCGCAGCAAAGGTAAGG<br>CCTAGGGGTTTCAATGGCGTGGTA          |
| <i>MoMAC1(s)</i>                 | Gene silencing | CCATGGAGGGCGAGAAGTCCACTG<br>CCTAGGTGGTGTTCGCGTAGAGCGATG        |
| <i>MoMAC1(as)</i>                | Gene silencing | CCATGGTGGTGTTCGCGTAGAGCGATG<br>CCTAGGAGGGCGAGAAGTCCACTG        |
| <i>MoPMK1(s)</i>                 | Gene silencing | CCATGGTACTTCAACCACGAGAACATC<br>CCTAGGAGAACGAGCCAGACCAAA        |
| <i>MoPMK1(as)</i>                | Gene silencing | CCATGGAGAACGAGCCAGACCAAA<br>CCTAGGTACTTCAACCACGAGAACATC        |
| <i>OsEF-1<math>\alpha</math></i> | qRT-PCR        | CCGCCAAGAAGAAATGAGCA<br>TCCATGCAACGAGTGCCAT                    |
| <i>BMV</i>                       | qRT-PCR        | ATATGGGCTTCCAAGGTCTG<br>TCGCGGTCAAACAACATGGC                   |
| <i>MoBT</i>                      | qRT-PCR        | ATTGGTGCTGCTTTCTGGCA<br>GGAAGAGCTGGCCAAAAGGA                   |
| <i>OsPDS</i>                     | qRT-PCR        | CATTGCCTGCACCCTTAAAT<br>GAACCTCACCACCCAAAGAG                   |
| <i>MoABC1</i>                    | qRT-PCR        | GATGCTGTCGTCGGTGTC<br>CTTGTCCGCTCTTGGTGA                       |
| <i>MoMAC1</i>                    | qRT-PCR        | CCAGCGATACACGAAGACA<br>AATACATTGGAGGTGGGAGA                    |
| <i>MoPMK1</i>                    | qRT-PCR        | CCAATCCACCAAGCAACT<br>TGATCTTCTTTATGGCAACC                     |
